# Supplementary material for: Simultaneouly enhanced durability and performance by employing dopamine copolymerized PEDOT with high work function and water-proofness for inverted perovskite solar cells
Source: Royal Society of Chemistry journal article supplement (doi:10.1039/c7tc05276f), 2018-01-01
Supplement: c7tc05276f1.pdf [file c7tc05276f1.pdf]

1 Simultaneously Enhanced Durability and Performance by Employing Dopamine Copolymerized  
2 PEDOT with High Work Function and Water-proofness for Inverted Perovskite Solar Cells

3 Ju Huang,<sup>a†</sup> Chunhua Wang,<sup>c†</sup> Ziyi Liu,<sup>d</sup> Xueqing Qiu,<sup>\*b</sup> Junliang Yang<sup>\*c</sup> and Jingjing Chang<sup>\*d</sup>

4

5 <sup>a</sup>School of Chemistry and Chemical Engineering, Guangdong Pharmaceutical University, Guangzhou 510006, China..

6 <sup>b</sup>State Key Laboratory of Pulp and Paper Engineering, School of Chemistry and Chemical Engineering, South China  
7 University of Technology, Guangzhou 510640, China.

8 <sup>c</sup>Hunan Key Laboratory for Super-microstructure and Ultrafast Process, School of Physics and Electronics, Central  
9 South University, Changsha 410083, China.

10 <sup>d</sup>State Key Discipline Laboratory of Wide Band Gap Semiconductor Technology, Shaanxi Joint Key Laboratory of  
11 Graphene, School of Microelectronics, Xidian University Xi'an, 710071, China.

12 \*Email - [xianghuangj@163.com](mailto:xianghuangj@163.com)

13 † -Dual Contributors

14

15

16 Partial characterization results

17

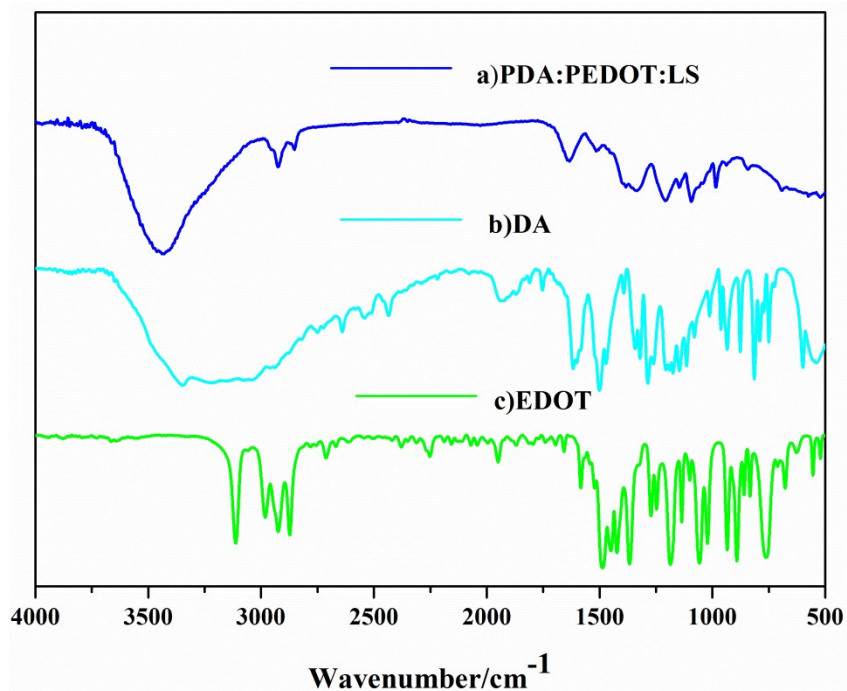

18

19

**Figure S1.** IR spectra of samples: a) PDA:PEDOT:LS; b) DA; c) EDOT.

20

21

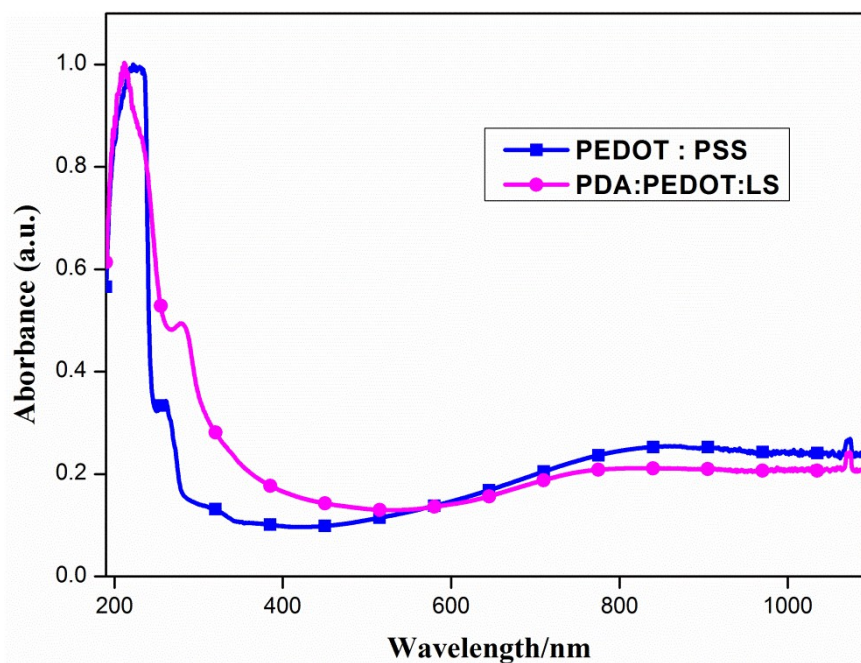

22

23

24

**Figure S2.** The UV-vis absorption spectra for PEDOT:PSS and PDA:PEDOT:LS;

25

---

26 **Table S1.** The conductivity of PEDOT:PSS ,PDA:PEDOT:LS and PDA:PEDOT:LS-h.

| Sample         | Conductivity (s/cm) |
|----------------|---------------------|
| PEDOT:PSS      | 0.02                |
| PDA:PEDOT:LS   | 0.004               |
| PDA:PEDOT:LS-h | 0.08                |

27

28

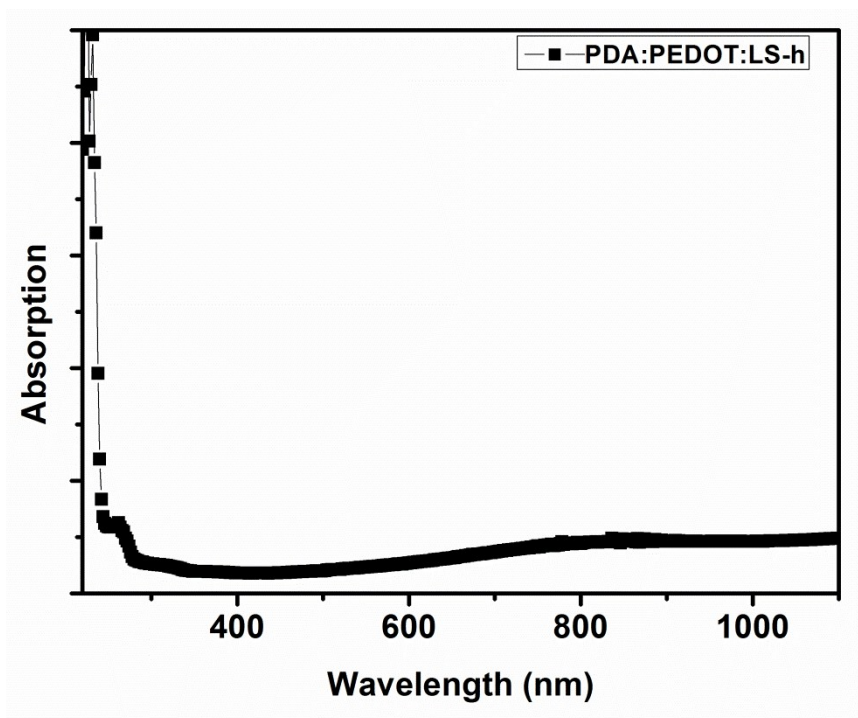

29

30

31

**Figure S3.** The UV-*vis* absorption spectra for the PDA:PEDOT:LS-h dispersions

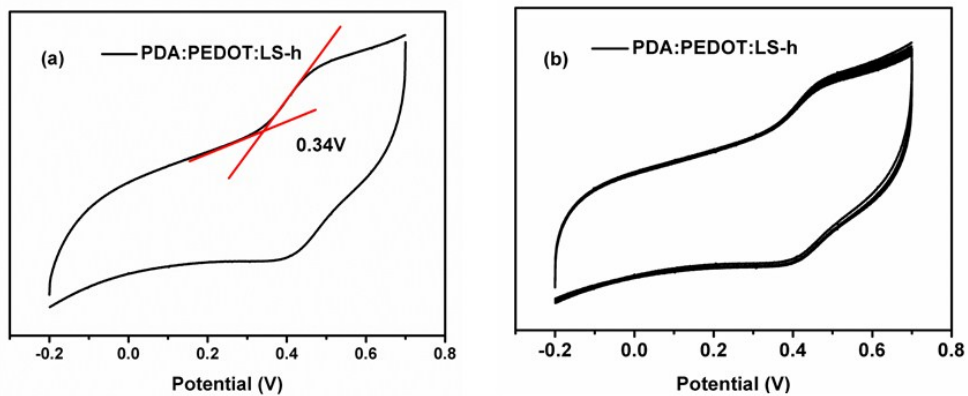

32

33 **Figure S4.** Cyclic voltammogram of PDA:PEDOT:LS-h film in  $\text{CH}_2\text{Cl}_2$  (a); 30 scans (b)  
34 (0.1M  $\text{Bu}_4\text{NPF}_6$ , Scan rate: 100 mV/s).

35

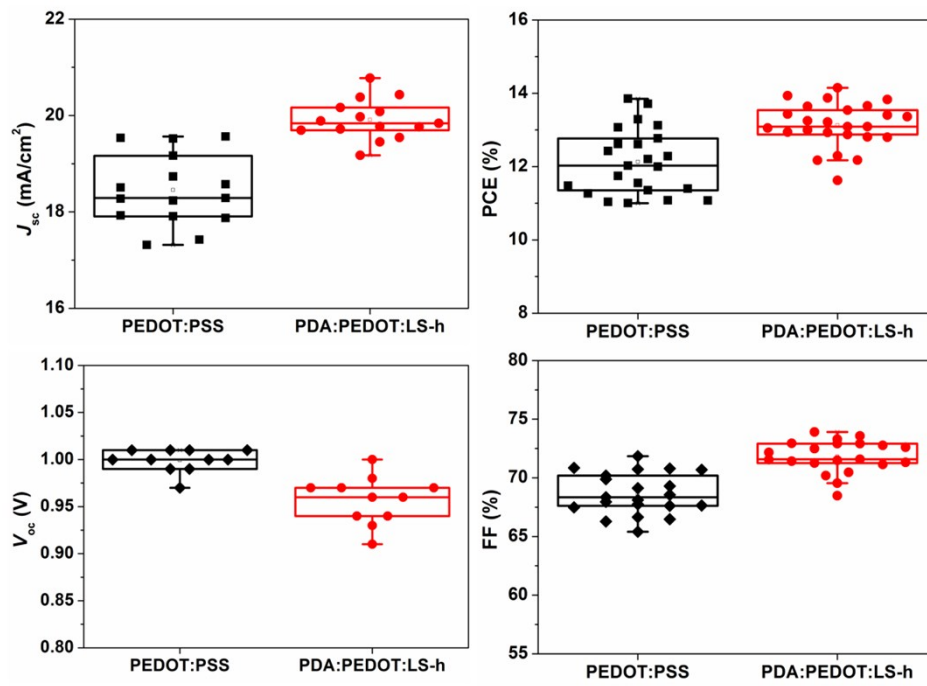

37

38 **Figure S5.** The statistic device performances with PEDOT: PSS and PDA:PEDOT:LS-h as  
39 the HELs, respectively.

40

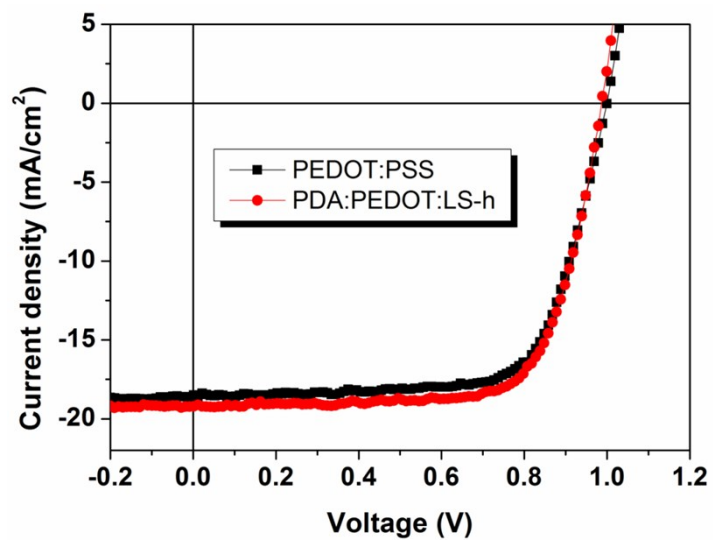

41

42 **Figure S6.** *J-V* curves of the PSCs with PEDOT:PSS and PDA:PEDOT:LS-h as the HELs

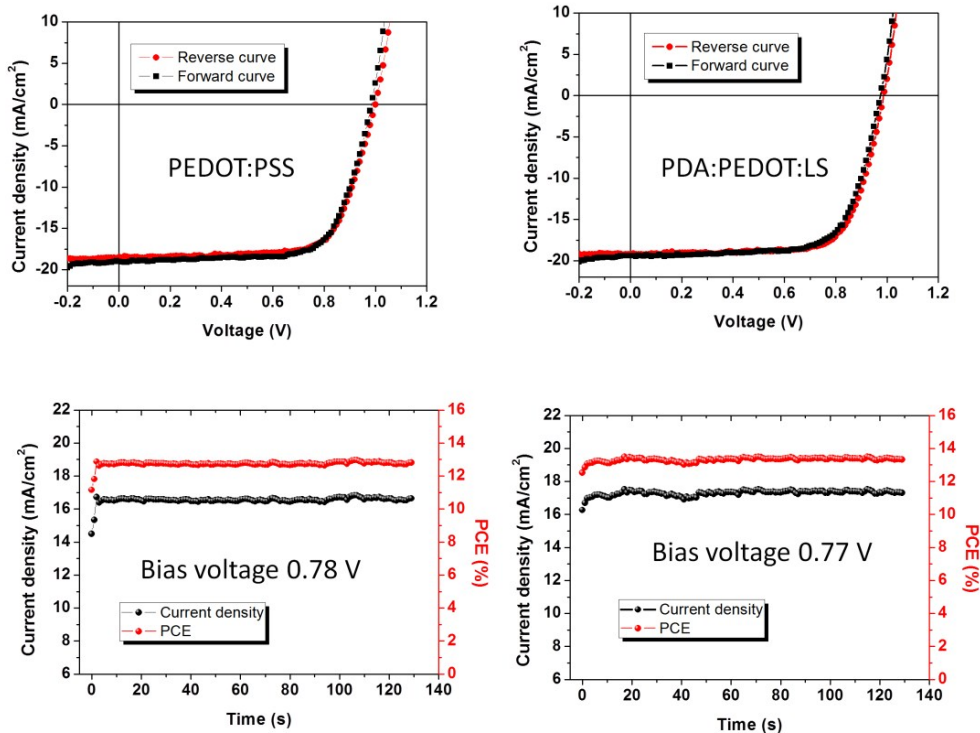

44

45 **Figure S7.** (a-b) *J-V* curves of devices with (a) PEDOT: PSS and (b) PDA:PEDOT:LS-h HEL  
 46 measured along the forward (from -0.2 V to 1.1 V) and reverse (from 1.1 V to -0.2 V)  
 47 scans. The voltage step is 0.01V, and the delay time is 100 ms; Steady output  
 48 characteristics of devices with (c) PEDOT:PSS and (d) PDA:PEDOT:LS-h as the HELs.

49



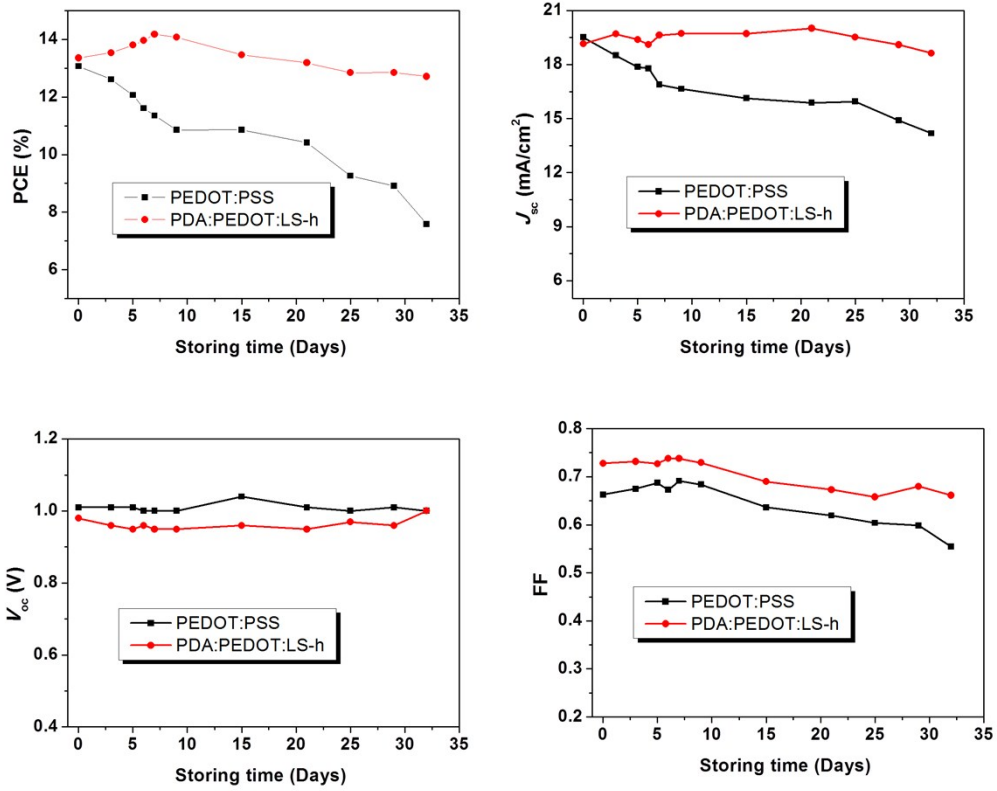

50

51 **Figure S8.** Stability characteristics of the PSCs using PEDOT:PSS and PDA:PEDOT:LS-h  
 52 as the HELs. (a) PCE; (b)  $J_{sc}$ ; (c)  $V_{oc}$ ; (d) FF.

53
